# Supplementary material for: Prostate-specific antigen response and clinical progression-free survival in Black and White men with chemotherapy-naïve metastatic castration-resistant prostate cancer treated with enzalutamide in a real-world setting
Source: PubMed Central journal article supplement (PMC10449620; doi:10.1038/s41391-022-00622-6), 2022-12-14
Supplement: 41391_2022_622_MOESM1_ESM.pdf [file 41391_2022_622_MOESM1_ESM.pdf]

## **Supplementary material**

**Supplementary Fig. 1** Post-index PSA test count

**Supplementary Fig. 2** Kaplan-Meier curves for  $\geq 75\%$  PSA decline

**Supplementary Table 1** Summary of multivariable Cox analysis for association of race with PSA decline from baseline

**Supplementary Table 2** Summary of multivariable Cox analysis for association of race with cPFS

**Supplementary Table 3** Summary of multivariable Cox analysis for association of race with 12-month cPFS

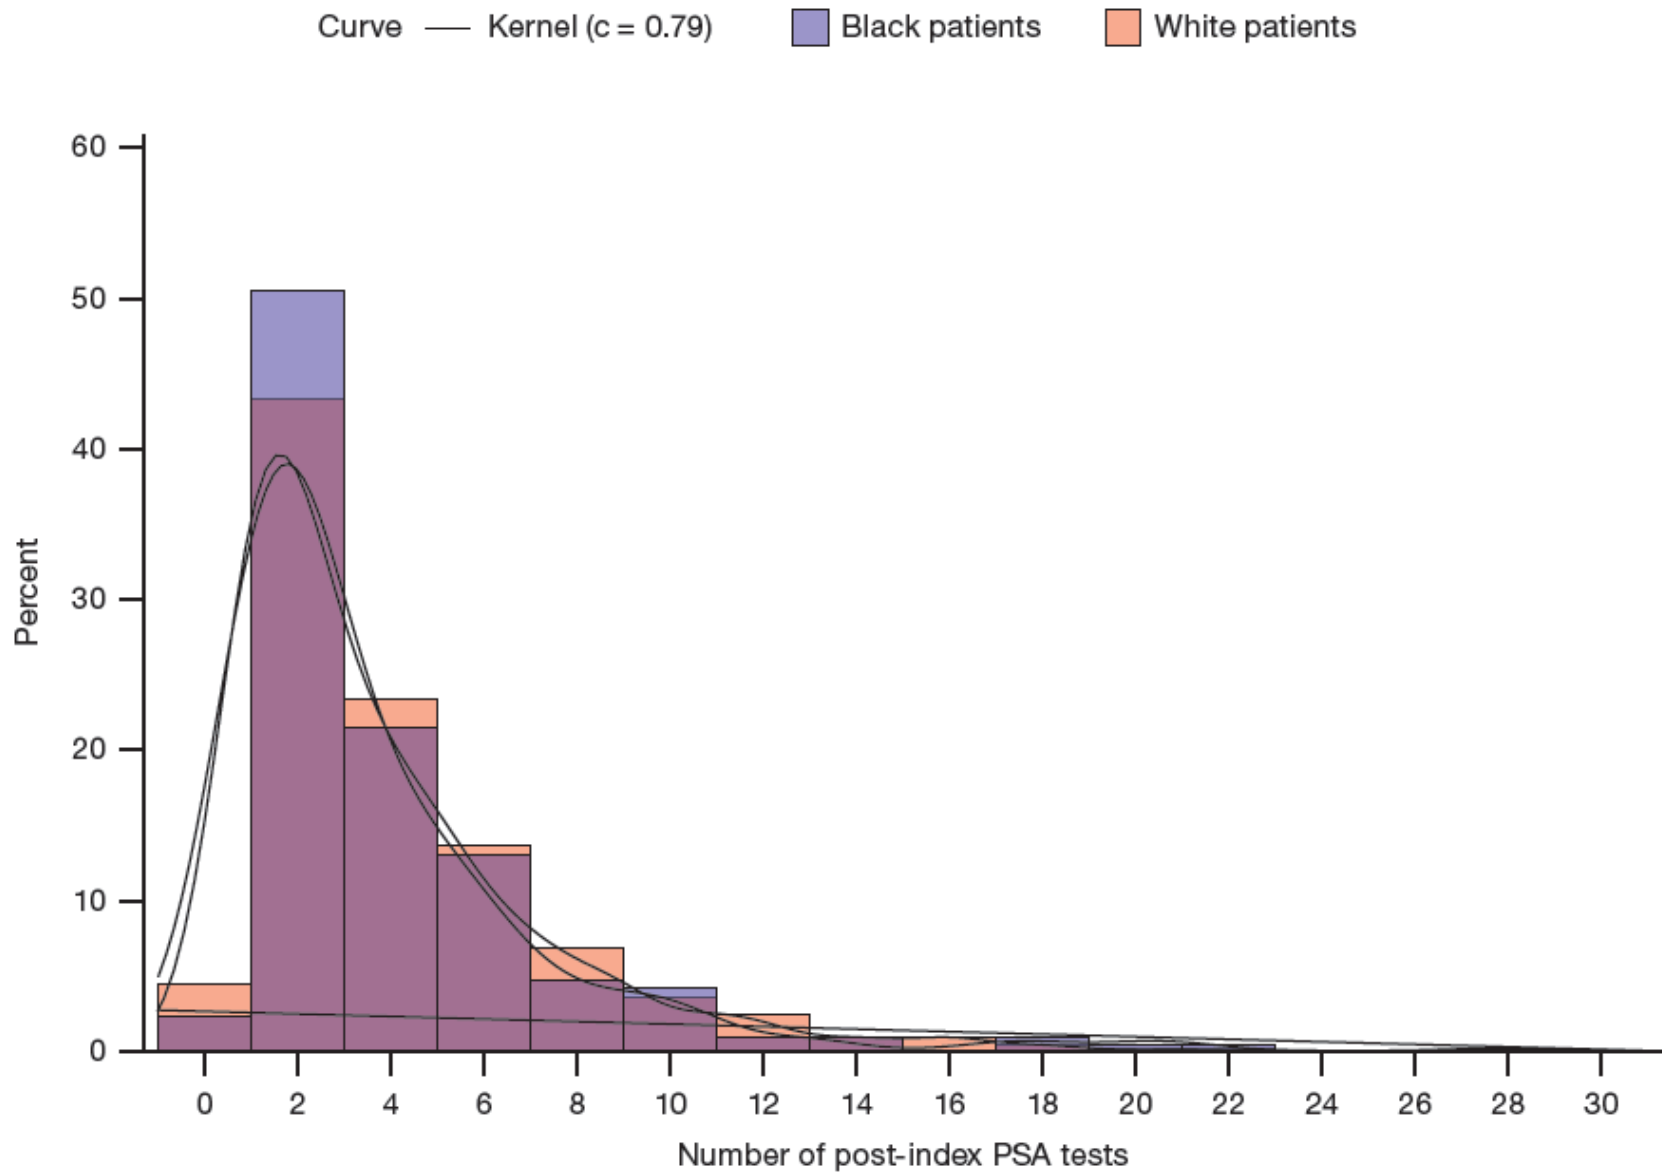

| <b>Post-index<br/>PSA tests</b> | <b>Black patients, n (%)<br/>(n = 214)</b> | <b>White patients, n (%)<br/>(n = 1332)</b> | <b>P value</b> |
|---------------------------------|--------------------------------------------|---------------------------------------------|----------------|
| <b>0<sup>a</sup></b>            | 5 (2.3)                                    | 59 (4.4)                                    | 0.5874         |
| <b>1</b>                        | 55 (25.7)                                  | 300 (22.5)                                  |                |
| <b>2</b>                        | 53 (25.7)                                  | 277 (20.8)                                  |                |
| <b>3</b>                        | 28 (13.1)                                  | 178 (13.4)                                  |                |
| <b>4</b>                        | 18 (8.4)                                   | 133 (10.0)                                  |                |
| <b>5</b>                        | 16 (7.5)                                   | 108 (8.1)                                   |                |
| <b>6</b>                        | 12 (5.6)                                   | 73 (5.5)                                    |                |
| <b>7+</b>                       | 27 (12.6)                                  | 204 (15.3)                                  |                |
| <b>Mean (SD)</b>                | 3.52 (3.35)                                | 3.70 (3.34)                                 | 0.3290         |
| <b>Median (IQR)</b>             | 2.00 (1.00–5.00)                           | 3.00 (1.00–5.00)                            |                |

**Supplementary Fig. 1 Post-index PSA test count.** <sup>a</sup>PSA tests for patients who died were not included in the post-index period. *PSA* prostate-specific antigen.

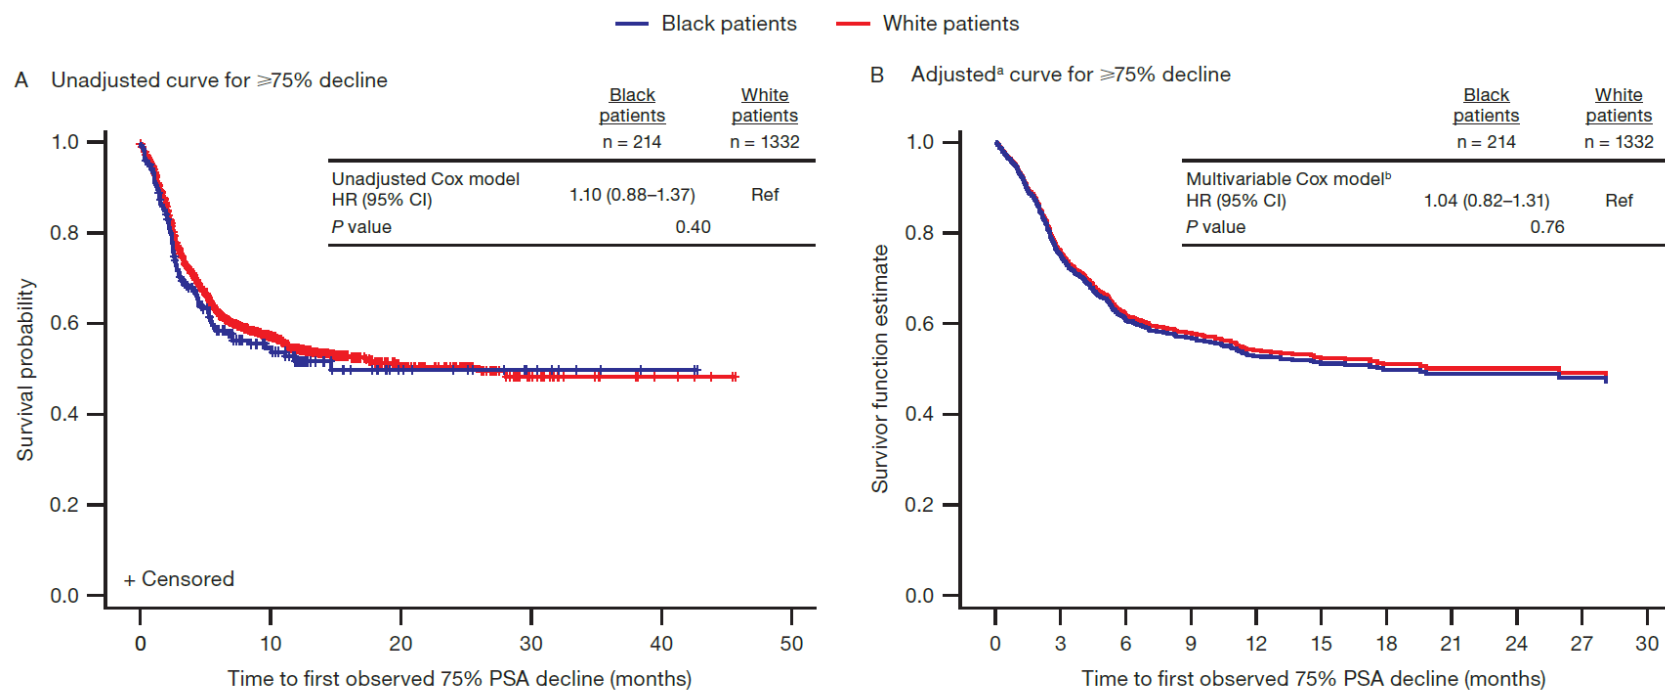

|                |      |     |     |    |   |   |
|----------------|------|-----|-----|----|---|---|
| Black patients | 214  | 62  | 16  | 8  | 2 | 0 |
| White patients | 1332 | 367 | 104 | 28 | 5 | 0 |

**Supplementary Fig. 2 Kaplan-Meier curves for  $\geq 75\%$  PSA decline.** <sup>a</sup>Since adjusted curves graph only events, the population is followed up only until the last event. Any values censored after the last event cannot be displayed on adjusted KM curves.

<sup>b</sup>Multivariable Cox proportional HR adjusted for baseline covariates of age, region, marital status, year of enzalutamide initiation, CCI, baseline log PSA, pre-index treatments, and documentation of metastasis. *CCI* Charlson Comorbidity Index, *KM* Kaplan-Meier, *PSA* prostate-specific antigen, *Ref* reference.

**Supplementary Table 1** Summary of multivariable Cox analysis for association of race with PSA decline from baseline PSA

| Baseline characteristic  | ≥50% PSA decline |              |                | ≥75% PSA decline |              |                | ≥90% PSA decline |              |                |   |   |   |
|--------------------------|------------------|--------------|----------------|------------------|--------------|----------------|------------------|--------------|----------------|---|---|---|
|                          | HR               | 95% CI       | <i>P</i> value | HR               | 95% CI       | <i>P</i> value | HR               | 95% CI       | <i>P</i> value |   |   |   |
| <b>Race</b>              |                  |              |                |                  |              |                |                  |              |                |   |   |   |
| White                    | Ref              | -            | -              | -                | Ref          | -              | -                | -            | Ref            | - | - | - |
| Black                    | 1.02             | [0.83, 1.25] | 0.8822         | 1.04             | [0.82, 1.31] | 0.7638         | 1.23             | [0.93, 1.62] | 0.1435         |   |   |   |
| <b>Age group</b>         |                  |              |                |                  |              |                |                  |              |                |   |   |   |
| 40–59                    | Ref              | -            | -              | -                | Ref          | -              | -                | -            | Ref            | - | - | - |
| 60–79                    | 0.95             | [0.67, 1.35] | 0.7736         | 0.87             | [0.58, 1.29] | 0.4831         | 0.74             | [0.47, 1.19] | 0.2114         |   |   |   |
| ≥80                      | 0.86             | [0.60, 1.25] | 0.4387         | 0.74             | [0.49, 1.13] | 0.1636         | 0.63             | [0.38, 1.03] | 0.0668         |   |   |   |
| <b>Geographic region</b> |                  |              |                |                  |              |                |                  |              |                |   |   |   |
| South                    | Ref              | -            | -              | -                | Ref          | -              | -                | -            | Ref            | - | - | - |
| Midwest                  | 1.14             | [0.96, 1.35] | 0.1329         | 1.13             | [0.93, 1.38] | 0.2091         | 1.29             | [1.02, 1.64] | 0.0358         |   |   |   |
| Northeast                | 0.90             | [0.74, 1.09] | 0.2836         | 0.96             | [0.76, 1.20] | 0.6963         | 0.98             | [0.74, 1.31] | 0.9020         |   |   |   |
| West                     | 1.01             | [0.79, 1.29] | 0.9461         | 1.06             | [0.80, 1.41] | 0.6726         | 1.13             | [0.79, 1.60] | 0.5074         |   |   |   |
| Unknown                  | 1.60             | [0.65, 3.91] | 0.3062         | 1.41             | [0.52, 3.85] | 0.4982         | 1.62             | [0.51, 5.19] | 0.4138         |   |   |   |

|                                         |      |        |       |         |      |        |       |         |      |        |       |         |
|-----------------------------------------|------|--------|-------|---------|------|--------|-------|---------|------|--------|-------|---------|
| <b>Marital status</b>                   |      |        |       |         |      |        |       |         |      |        |       |         |
| Single                                  | Ref  | -      | -     | -       | Ref  | -      | -     | -       | Ref  | -      | -     | -       |
| Married                                 | 0.97 | [0.76, | 1.24] | 0.8091  | 1.02 | [0.77, | 1.37] | 0.8771  | 1.01 | [0.71, | 1.43] | 0.9642  |
| Divorced                                | 1.30 | [0.89, | 1.88] | 0.1716  | 1.32 | [0.86, | 2.02] | 0.1997  | 1.21 | [0.72, | 2.05] | 0.4699  |
| Separated                               | 0.99 | [0.70, | 1.40] | 0.9657  | 1.15 | [0.78, | 1.70] | 0.4901  | 1.28 | [0.80, | 2.03] | 0.2999  |
| Unknown                                 | 1.23 | [0.89, | 1.69] | 0.2080  | 1.18 | [0.81, | 1.71] | 0.3894  | 0.96 | [0.60, | 1.53] | 0.8616  |
| <b>Year of index therapy initiation</b> |      |        |       |         |      |        |       |         |      |        |       |         |
| 2014                                    | Ref  | -      | -     | -       | Ref  | -      | -     | -       | Ref  | -      | -     | -       |
| 2015                                    | 0.91 | [0.69, | 1.20] | 0.5014  | 1.05 | [0.76, | 1.46] | 0.7675  | 1.23 | [0.80, | 1.88] | 0.3430  |
| 2016                                    | 0.85 | [0.64, | 1.12] | 0.2381  | 0.96 | [0.69, | 1.33] | 0.7981  | 1.11 | [0.73, | 1.70] | 0.6230  |
| 2017                                    | 1.00 | [0.76, | 1.31] | 0.9744  | 1.11 | [0.80, | 1.54] | 0.5279  | 1.40 | [0.92, | 2.14] | 0.1154  |
| 2018                                    | 1.12 | [0.70, | 1.82] | 0.6321  | 1.14 | [0.64, | 2.02] | 0.6623  | 1.09 | [0.49, | 2.43] | 0.8279  |
| <b>CCI score</b>                        | 0.98 | [0.92, | 1.05] | 0.5653  | 1.01 | [0.94, | 1.09] | 0.8079  | 1.02 | [0.93, | 1.12] | 0.6386  |
| <b>Log baseline PSA</b>                 | 1.08 | [1.04, | 1.12] | <0.0001 | 1.11 | [1.06, | 1.15] | <0.0001 | 1.14 | [1.08, | 1.20] | <0.0001 |
| <b>Pre-index therapies</b>              |      |        |       |         |      |        |       |         |      |        |       |         |
| Antiandrogen therapy                    | 0.87 | [0.75, | 1.01] | 0.0575  | 0.71 | [0.60, | 0.84] | <0.0001 | 0.74 | [0.60, | 0.92] | 0.0055  |
| Pain management therapy                 | 0.93 | [0.79, | 1.09] | 0.3651  | 0.84 | [0.70, | 1.01] | 0.0704  | 0.75 | [0.59, | 0.95] | 0.0158  |
| Bone-targeting agents                   | 0.90 | [0.78, | 1.05] | 0.1907  | 0.95 | [0.80, | 1.13] | 0.5602  | 0.91 | [0.74, | 1.13] | 0.4073  |

---

| <b>Site of metastasis</b> |      |        |       |        |      |        |       |        |      |        |       |        |
|---------------------------|------|--------|-------|--------|------|--------|-------|--------|------|--------|-------|--------|
| Undocumented              | Ref  | -      | -     | -      | Ref  | -      | -     | -      | Ref  | -      | -     | -      |
| Documented                | 1.23 | [1.05, | 1.45] | 0.0104 | 1.06 | [0.88, | 1.28] | 0.5252 | 0.88 | [0.69, | 1.11] | 0.2830 |

---

*CCI* Charlson Comorbidity Index, *PSA* prostate-specific antigen, *Ref* reference.

**Supplementary Table 2** Summary of multivariable Cox analysis for association of race with cPFS

| <b>Baseline characteristic</b> | <b>HR</b> | <b>95% CI</b> |       | <b>P value</b> |
|--------------------------------|-----------|---------------|-------|----------------|
| <b>Race</b>                    |           |               |       |                |
| White                          | Ref       | -             | -     | -              |
| Black                          | 0.82      | [0.68,        | 0.98] | 0.0290         |
| <b>Age group</b>               |           |               |       |                |
| 40–59                          | Ref       | -             | -     | -              |
| 60–79                          | 0.93      | [0.68,        | 1.28] | 0.6539         |
| ≥80                            | 1.02      | [0.74,        | 1.42] | 0.8913         |
| <b>Geographic region</b>       |           |               |       |                |
| South                          | Ref       | -             | -     | -              |
| Midwest                        | 1.00      | [0.87,        | 1.16] | 0.9955         |
| Northeast                      | 1.13      | [0.96,        | 1.32] | 0.1558         |
| West                           | 0.90      | [0.73,        | 1.11] | 0.3256         |
| Unknown                        | 2.08      | [1.03,        | 4.24] | 0.0424         |
| <b>Marital status</b>          |           |               |       |                |
| Single                         | Ref       | -             | -     | -              |
| Married                        | 1.07      | [0.87,        | 1.32] | 0.5418         |
| Divorced                       | 0.88      | [0.63,        | 1.24] | 0.4566         |
| Separated                      | 0.99      | [0.75,        | 1.32] | 0.9577         |
| Unknown                        | 0.79      | [0.60,        | 1.05] | 0.1055         |



---

|                                         |      |        |       |        |
|-----------------------------------------|------|--------|-------|--------|
| <b>Year of index therapy initiation</b> |      |        |       |        |
| 2014                                    | Ref  | -      | -     | -      |
| 2015                                    | 0.95 | [0.76, | 1.18] | 0.6184 |
| 2016                                    | 0.91 | [0.73, | 1.13] | 0.3964 |
| 2017                                    | 0.85 | [0.67, | 1.07] | 0.1564 |
| 2018                                    | 1.11 | [0.67, | 1.84] | 0.6950 |
| <b>CCI score</b>                        | 1.01 | [0.96, | 1.07] | 0.6336 |
| <b>Log baseline PSA</b>                 | 1.04 | [1.01, | 1.07] | 0.0094 |
| <b>Pre-index therapies</b>              |      |        |       |        |
| Antiandrogen therapy                    | 1.01 | [0.89, | 1.14] | 0.9390 |
| Pain management therapy                 | 1.23 | [1.08, | 1.39] | 0.0019 |
| Bone-targeting agents                   | 1.06 | [0.93, | 1.20] | 0.3743 |
| <b>Site of metastasis</b>               |      |        |       |        |
| Undocumented                            | Ref  | -      | -     | -      |
| Documented                              | 1.28 | [1.12, | 1.46] | 0.0003 |

---

*CCI* Charlson comorbidity index, *cPFS* clinical progression-free survival,

*PSA* prostate-specific antigen, *Ref* reference.

**Supplementary Table 3** Summary of multivariable Cox analysis for association of race with 12-month cPFS

| <b>Baseline characteristics</b> | <b>HR</b> | <b>95% CI</b> |       | <b>P value</b> |
|---------------------------------|-----------|---------------|-------|----------------|
| <b>Race</b>                     |           |               |       |                |
| White                           | Ref       | -             | -     | -              |
| Black                           | 0.84      | [0.68,        | 1.03] | 0.0853         |
| <b>Age group</b>                |           |               |       |                |
| 40-59                           | Ref       | -             | -     | -              |
| 60-79                           | 1.05      | [0.73,        | 1.51] | 0.8076         |
| ≥80                             | 1.22      | [0.84,        | 1.78] | 0.2972         |
| <b>Geographic region</b>        |           |               |       |                |
| South                           | Ref       | -             | -     | -              |
| Midwest                         | 0.98      | [0.84,        | 1.15] | 0.8219         |
| Northeast                       | 1.14      | [0.95,        | 1.36] | 0.1612         |
| West                            | 0.95      | [0.76,        | 1.19] | 0.6557         |
| Unknown                         | 1.66      | [0.73,        | 3.74] | 0.2263         |
| <b>Marital status</b>           |           |               |       |                |
| Single                          | Ref       | -             | -     | -              |
| Married                         | 1.10      | [0.87,        | 1.39] | 0.4117         |
| Divorced                        | 0.86      | [0.59,        | 1.27] | 0.4488         |
| Separated                       | 1.08      | [0.79,        | 1.48] | 0.6372         |
| Unknown                         | 0.91      | [0.66,        | 1.24] | 0.5393         |

---

|                                         |      |        |       |         |
|-----------------------------------------|------|--------|-------|---------|
| <b>Year of index therapy initiation</b> |      |        |       |         |
| 2014                                    | Ref  | -      | -     | -       |
| 2015                                    | 1.12 | [0.86, | 1.44] | 0.3971  |
| 2016                                    | 0.98 | [0.76, | 1.27] | 0.8813  |
| 2017                                    | 0.99 | [0.76, | 1.29] | 0.9511  |
| 2018                                    | 1.27 | [0.75, | 2.13] | 0.3747  |
| <b>CCI score</b>                        | 1.01 | [0.95, | 1.07] | 0.7006  |
| <b>Log baseline PSA</b>                 | 1.04 | [1.01, | 1.08] | 0.0105  |
| <b>Pre-index therapies</b>              |      |        |       |         |
| Antiandrogen therapy                    | 1.00 | [0.87, | 1.15] | 0.9732  |
| Pain management therapy                 | 1.30 | [1.13, | 1.49] | 0.0002  |
| Bone-targeting agents                   | 1.06 | [0.92, | 1.22] | 0.4280  |
| <b>Site of metastasis</b>               |      |        |       |         |
| Undocumented                            | Ref  | -      | -     | -       |
| Documented                              | 1.35 | [1.17, | 1.56] | <0.0001 |

---

*CCI* Charlson comorbidity index, *cPFS* clinical progression-free survival,

*PSA* prostate-specific antigen, *Ref* reference.
